# Supplementary material for: Screening of mRNA Chemical Modification to Maximize Protein Expression with Reduced Immunogenicity
Source: MDPI journal article supplement (doi:10.3390/pharmaceutics7030137), 2015-07-23
Supplement: s1 [file s1]

## Supplementary Information

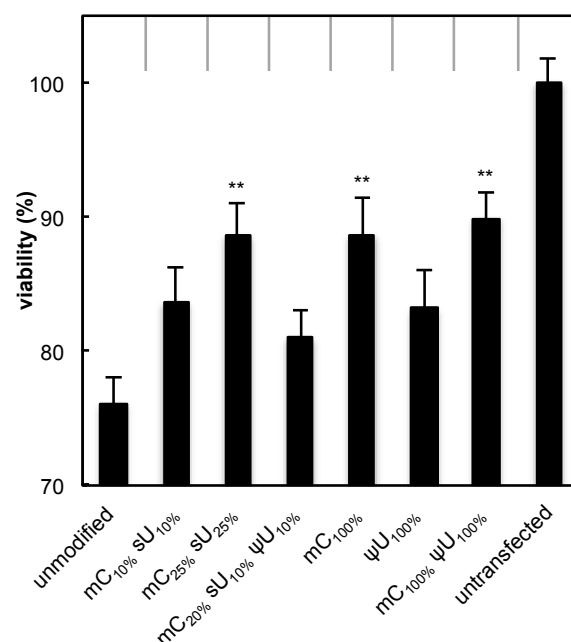

**Figure S1.** Cell viability after mRNA introduction to RAW264.7 cells. mRNA encoding GLuc was introduced to RAW264.7 cells using Lipofectamine™ LTX. After 4 h, cell viability was measured. Data are presented as the mean  $\pm$  standard error of the mean (S.E.M.) ( $N = 6$ ). Statistical significance was assessed by one-way analysis of variance (ANOVA) followed by Dunnett's test. \*\*,  $p < 0.01$  versus unmodified mRNA.

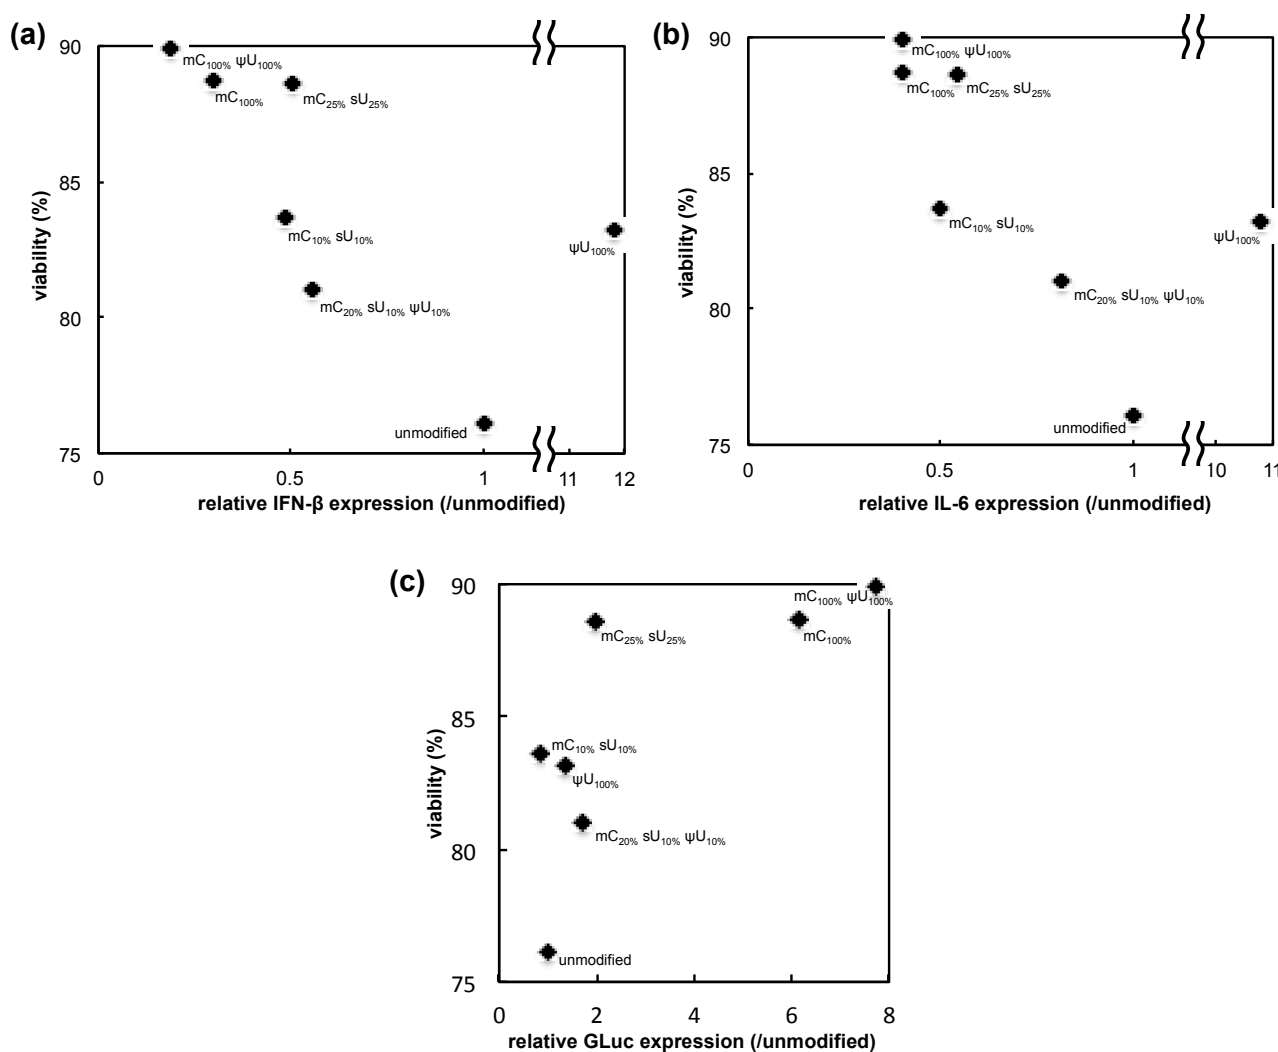

**Figure S2.** Correlation between cell viability, inflammatory responses, and GLuc expression. mRNA encoding GLuc was introduced to RAW264.7 cells using Lipofectamine™ LTX. After 4 h, cell viability (see Figure S1), expression of inflammatory molecules (see Figure 1), and GLuc expression (see Figure 2a) were measured. **(a,b)** Correlation between inflammatory responses and cell viability. **(c)** Correlation between GLuc expression and cell viability. The x-axis shows the expression of **(a)** interferon- $\beta$  (IFN- $\beta$ ), **(b)** interleukin-6 (IL-6), and **(c)** GLuc. The y-axis showed the cell viability.

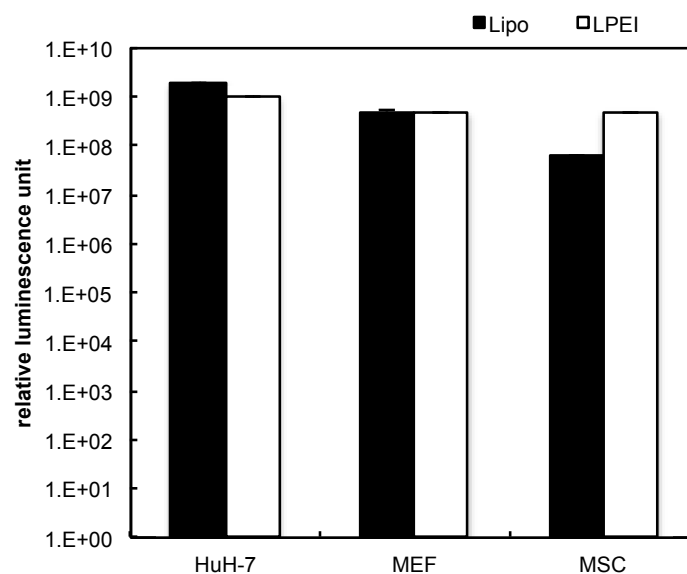

**Figure S3.** Comparison of GLuc expression efficiency by transfection of unmodified mRNA between two different transfection reagents. Unmodified mRNA was introduced to HuH-7 cells, MEFs and MSCs, using two types of transfection reagents, Lipofectamine™ LTX (Lipo, black bars) and linear polyethyleneimine (LPEI, white bars). The data are used in Figure 4 to calculate the “relative GLuc expression” by the modified mRNAs. Data are presented as the mean  $\pm$  standard error of the mean (S.E.M.) ( $N = 6$ ).
